# Supplementary figures and images for: A phase II trial of paclitaxel plus biweekly cetuximab for patients with recurrent or metastatic head and neck cancer previously treated with both platinum-based chemotherapy and anti-PD-1 antibody
Source: PubMed Central journal article supplement — ESMO Open. 2024 Jun 3;9(6):103476. doi: 10.1016/j.esmoop.2024.103476 (PMC11179070; doi:10.1016/j.esmoop.2024.103476), 2024-06-03

0 3 6 9 12 15 18 21 24 27 30 33 36

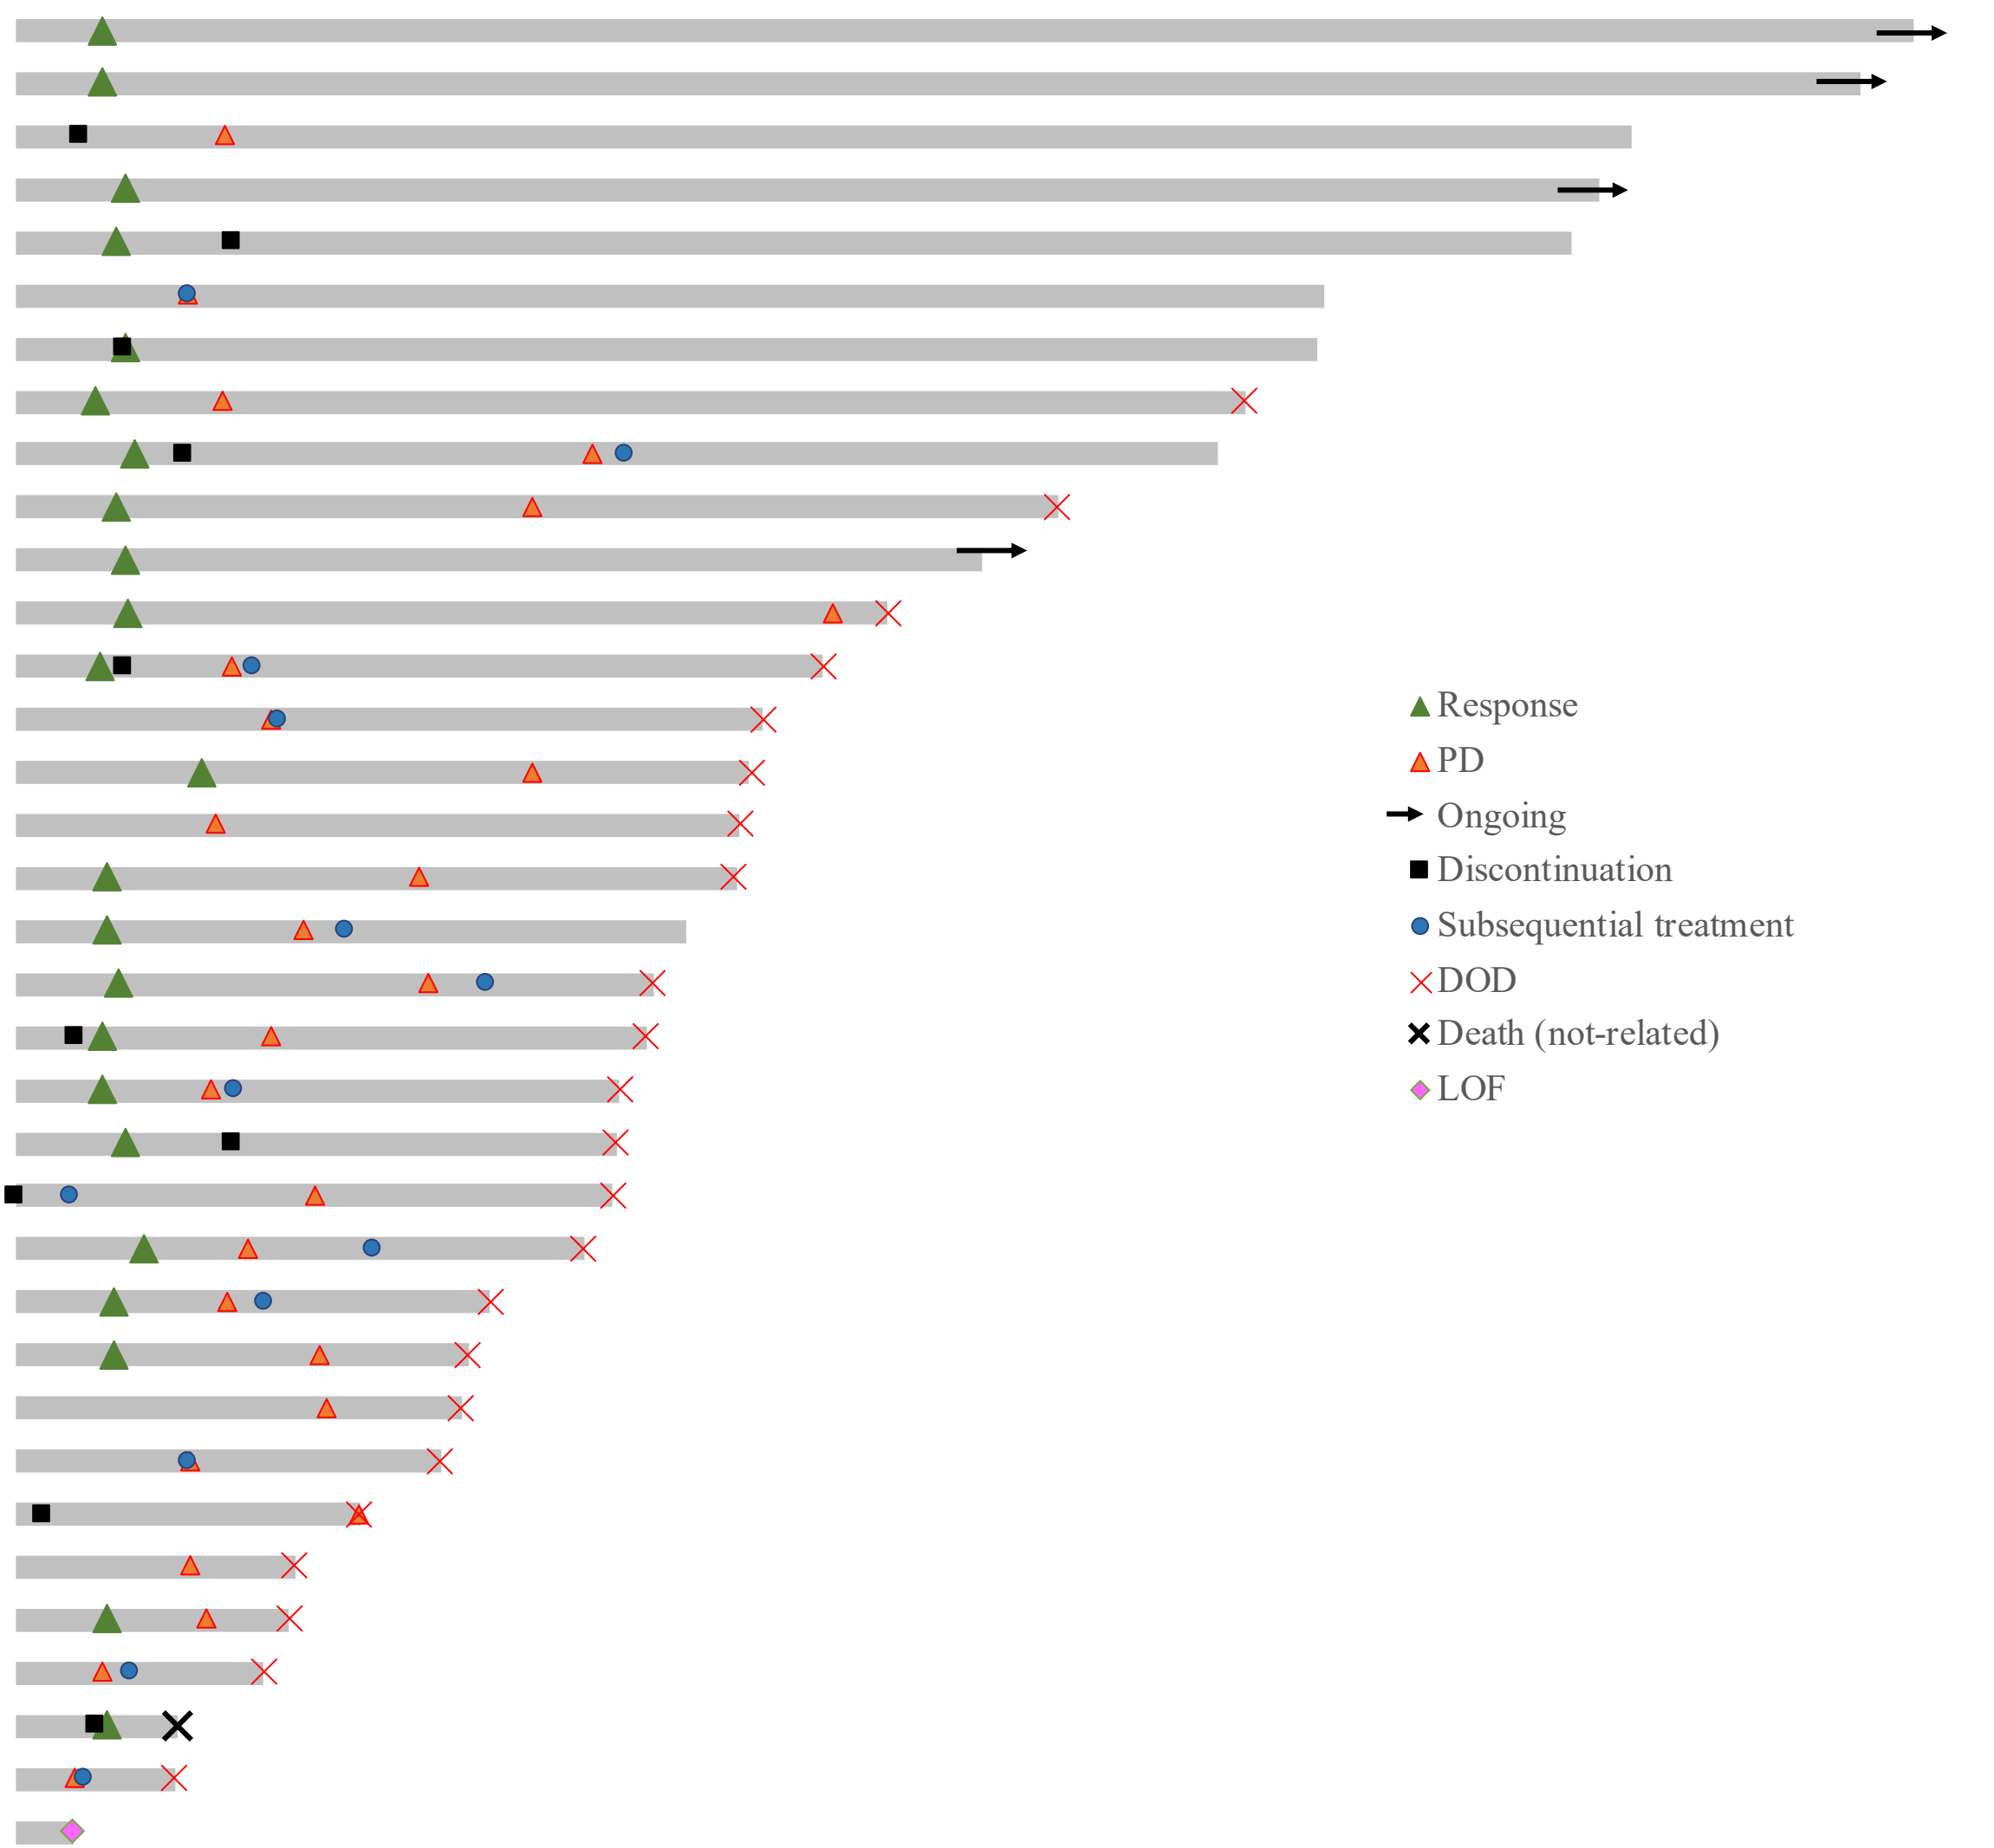

Supplement: mmc3.pdf [file mmc3.pdf]

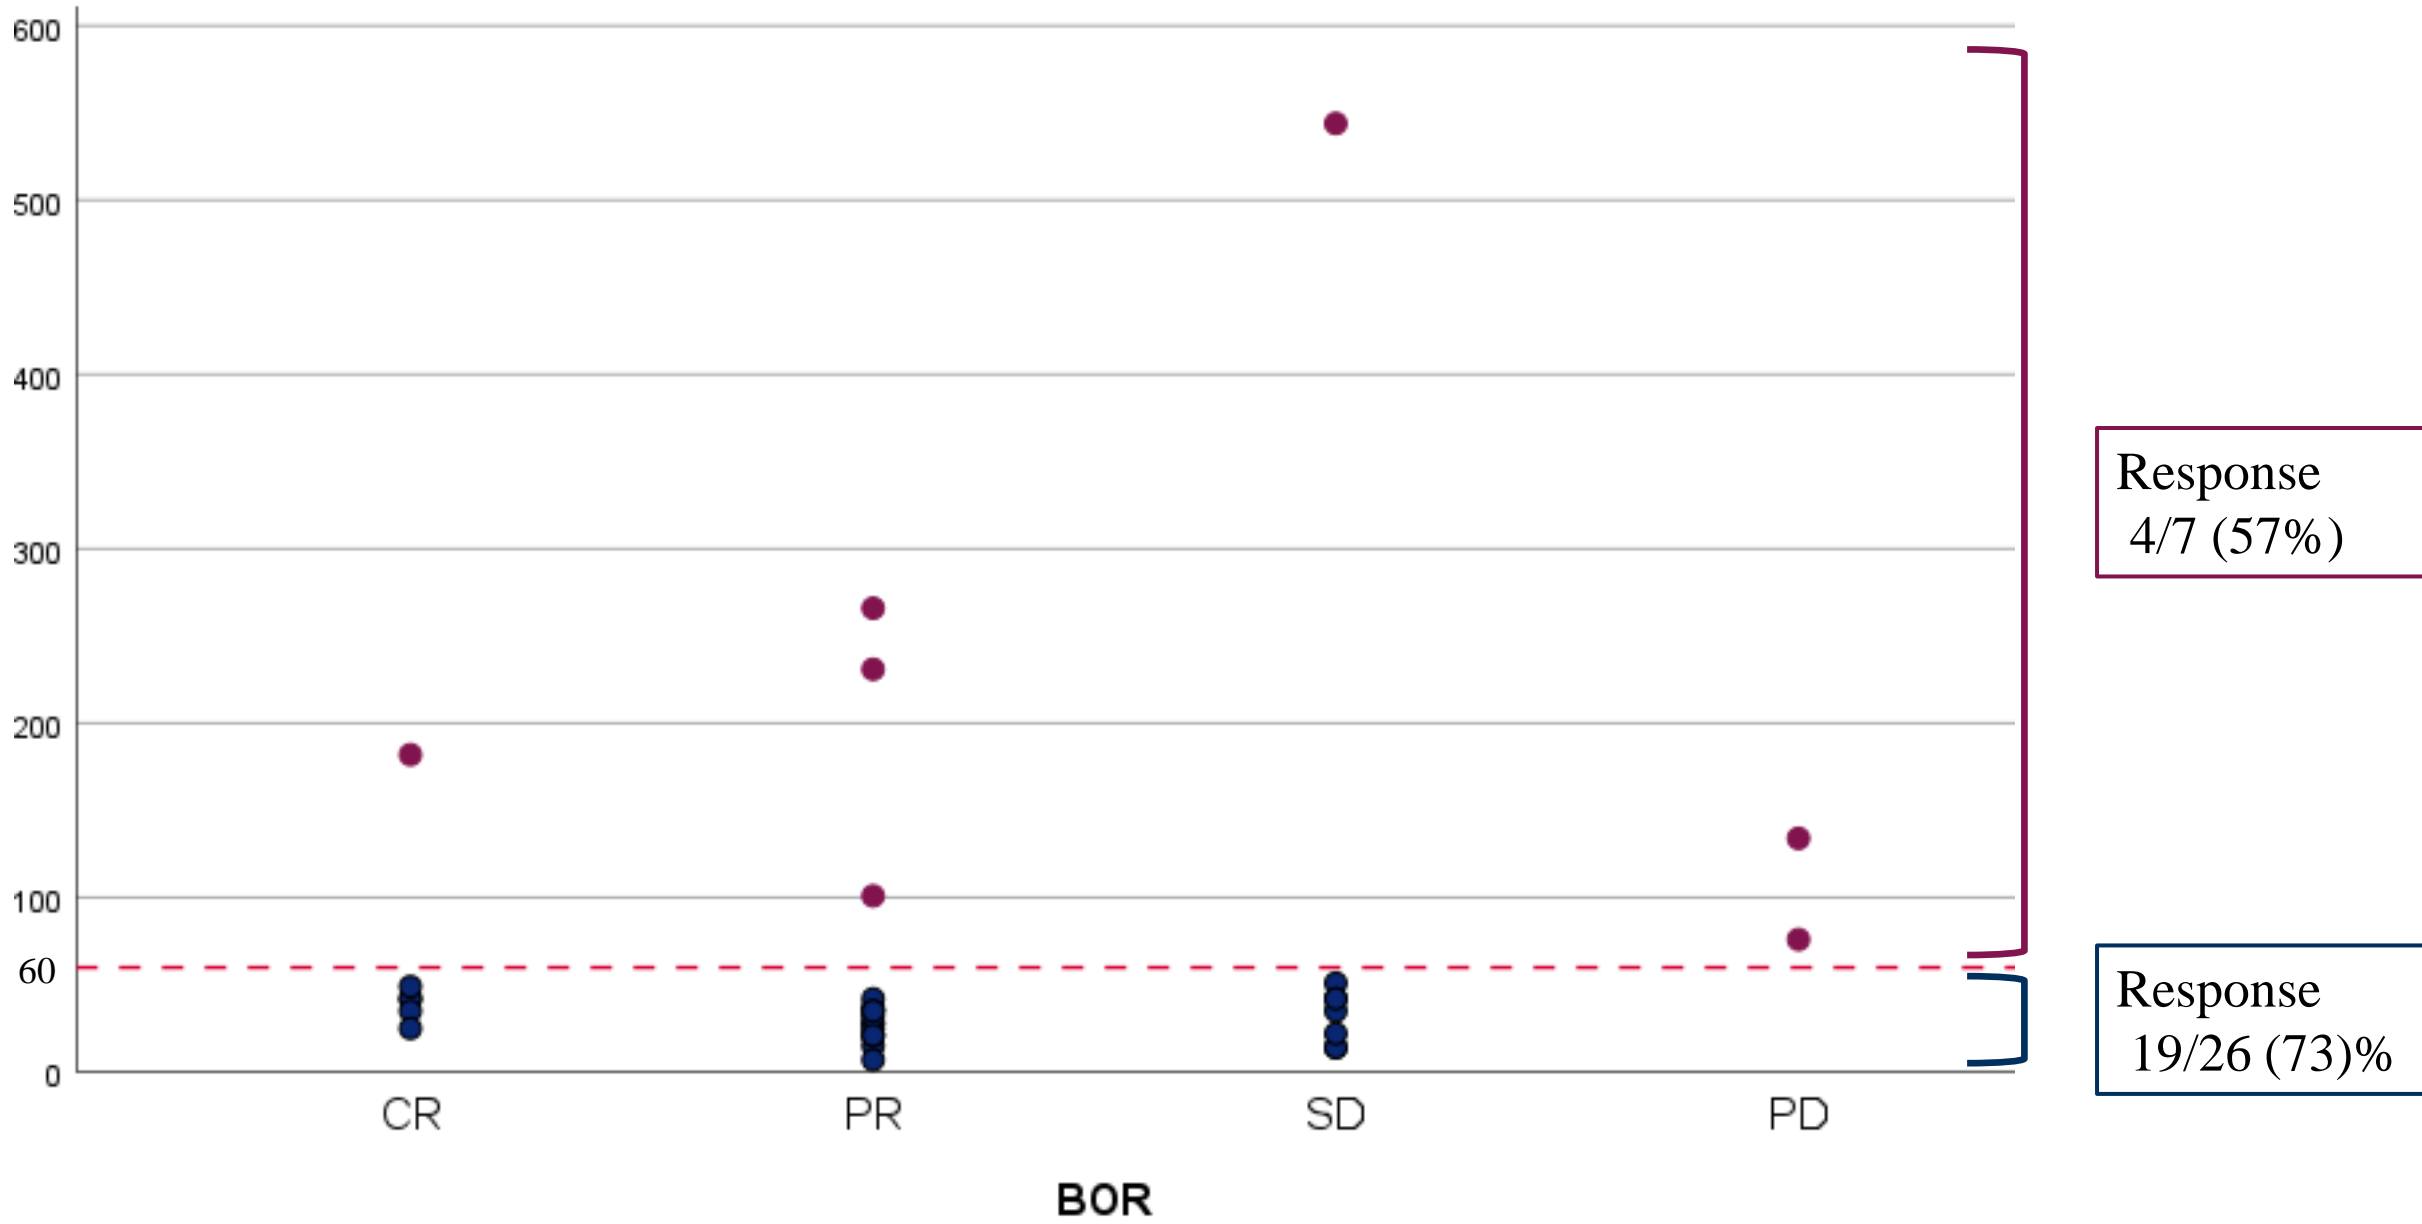

Supplement: mmc4.pdf [file mmc4.pdf]
